# Supplementary material for: Coarsely crystalline cryogenic cave carbonate – a new archive to estimate the Last Glacial minimum permafrost depth in Central Europe
Source: Copernicus journal article supplement (doi:10.5194/cp-8-1821-2012), 2012-11-14
Supplement: Supplementary file 1 [file cp-8-1821-2012-supplement.pdf]

**Electronic supplement for the paper:**

*K. Žák, D. K. Richter, M. Filippi, R. Živor, M. Deininger, A. Mangini and D. Scholz.: Coarsely crystalline cryogenic cave carbonate – a new archive to estimate the Last Glacial minimum permafrost depth in Central Europe.*

**Examples of in situ occurrences of coarsely crystalline cryogenic cave carbonate and its different morphological forms**

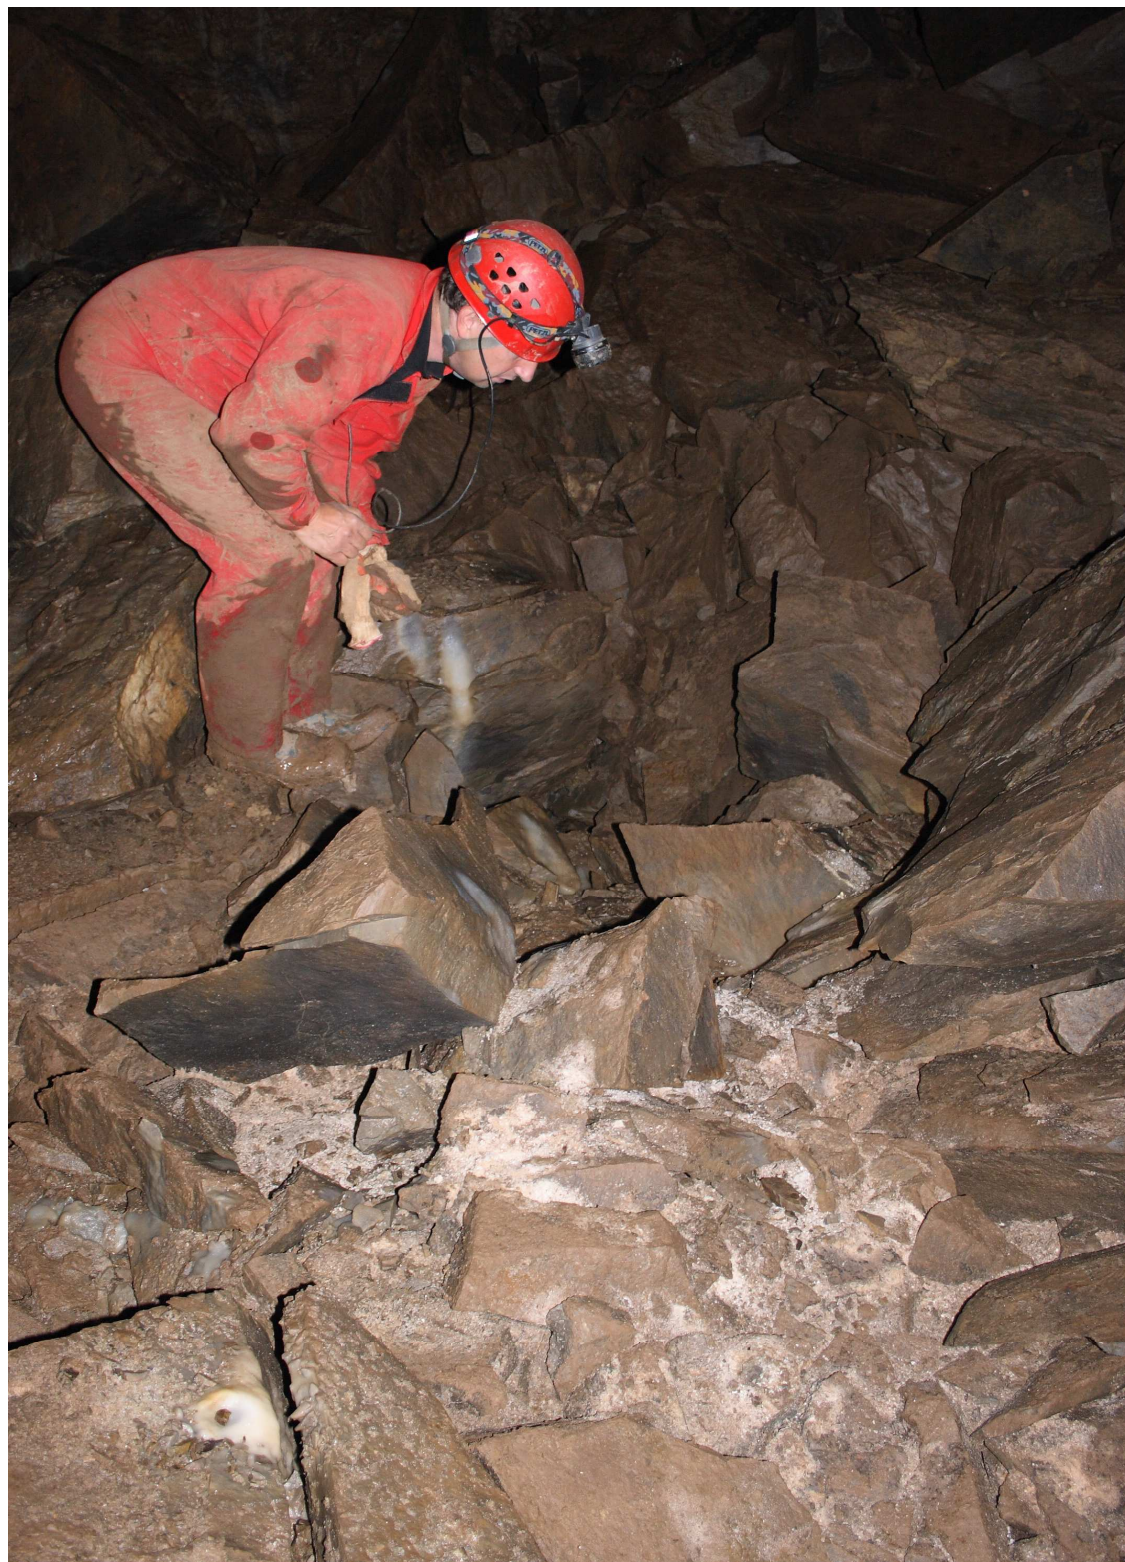

Fig. S1. General view of the typical occurrence of the CCC – white aggregates on the cave bottom. Heilenbecker Höhle, Germany. Photo by M. Filippi.



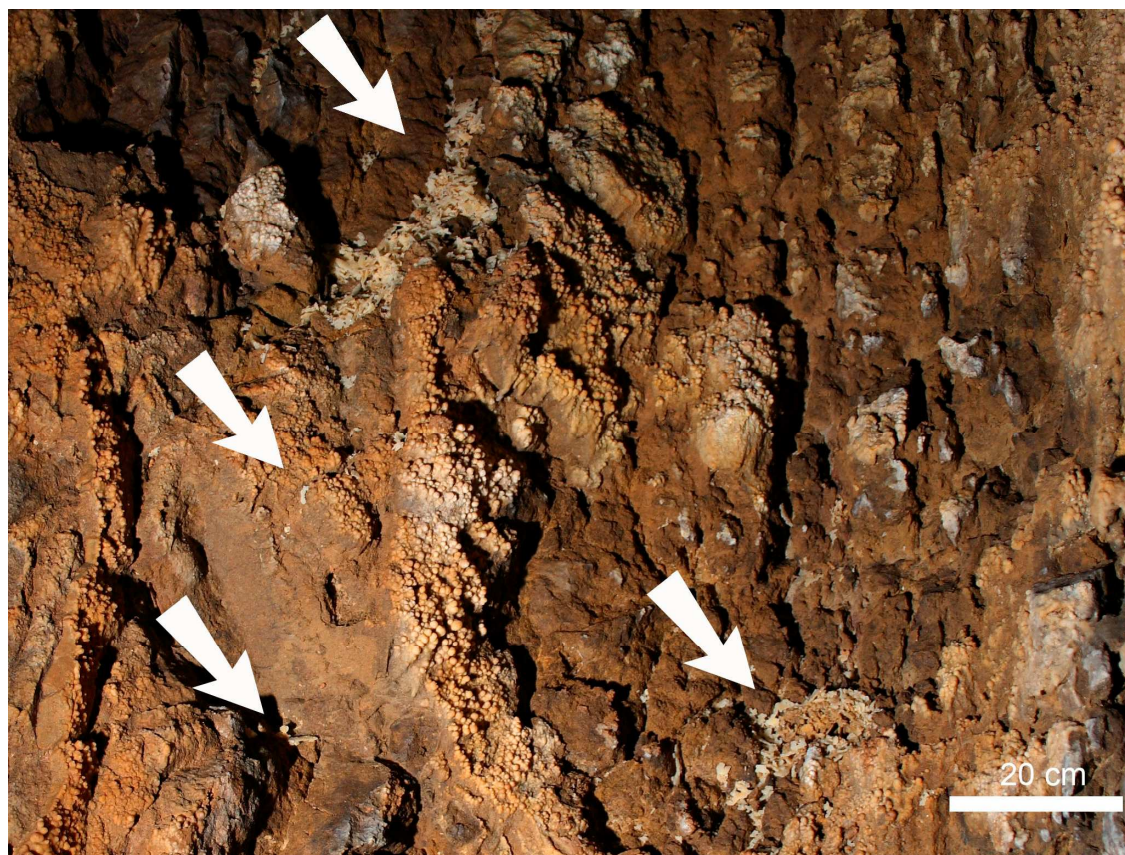

Fig. S2. The CCC trapped on the cave wall. Na Javorce Cave, Czech Republic. Photo by M. Filippi.

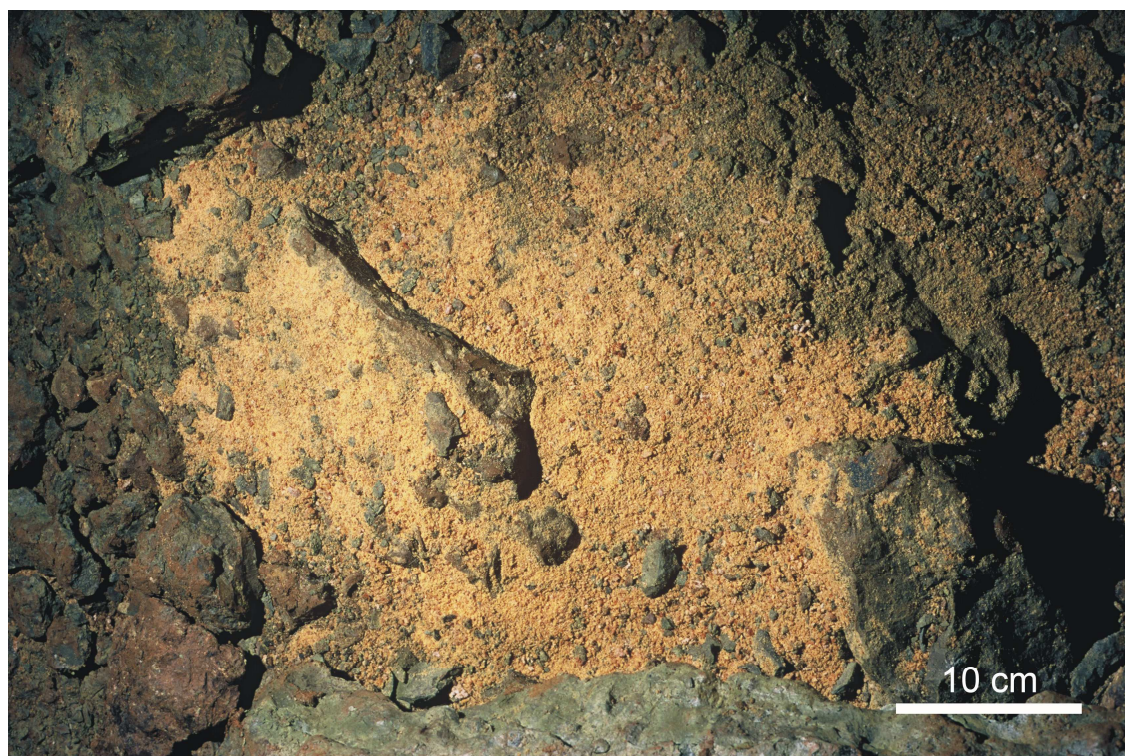

Fig. S3. Detailed view on accumulation of the loose CCC on the cave bottom. BUML Cave, Czech Republic. Photo by P. Zajíček.



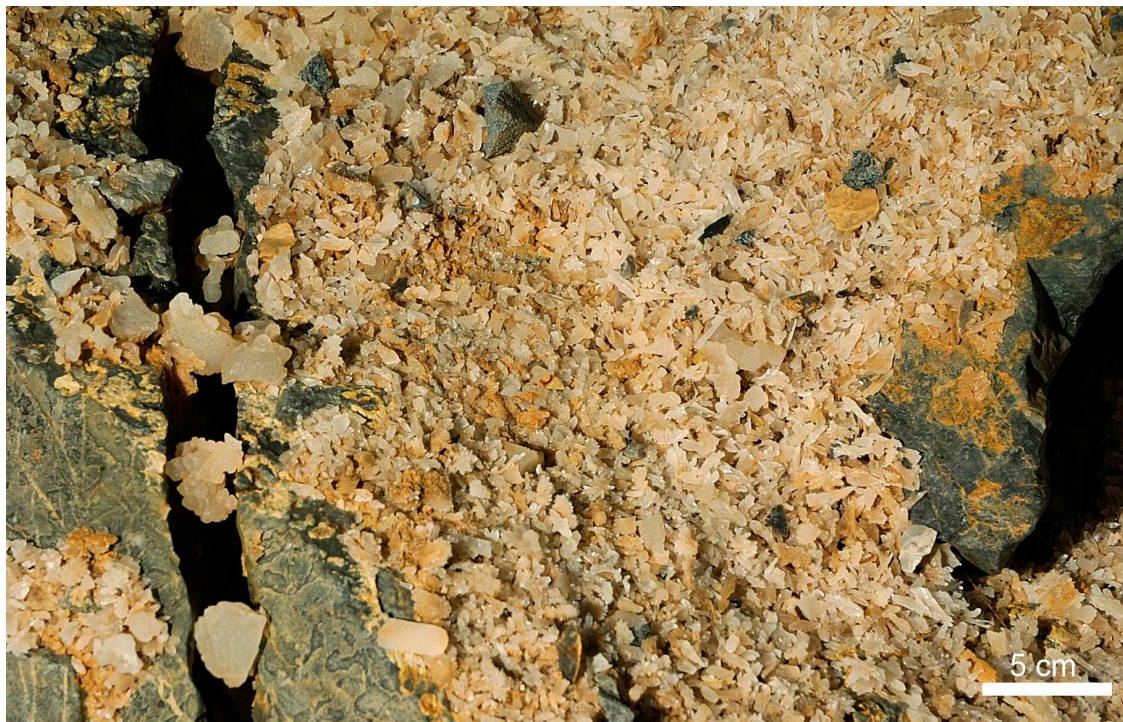

Fig. S4. Loose CCC on the limestone block surface at the cave bottom. Studeného Vetra Cave, Slovakia. Photo by M. Majer.

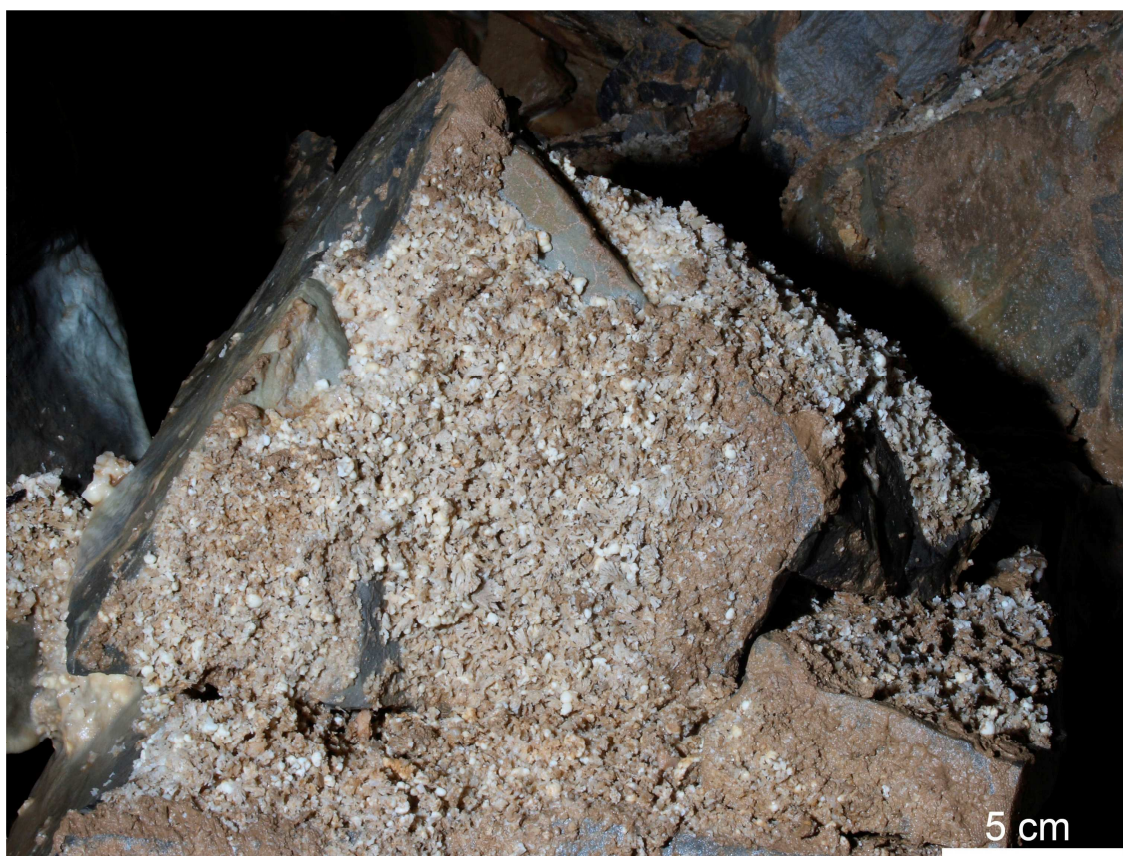

Fig. S5. Loose CCC on the surface of limestone blocks. Malachitdom, Germany. Photo by M. Filippi.



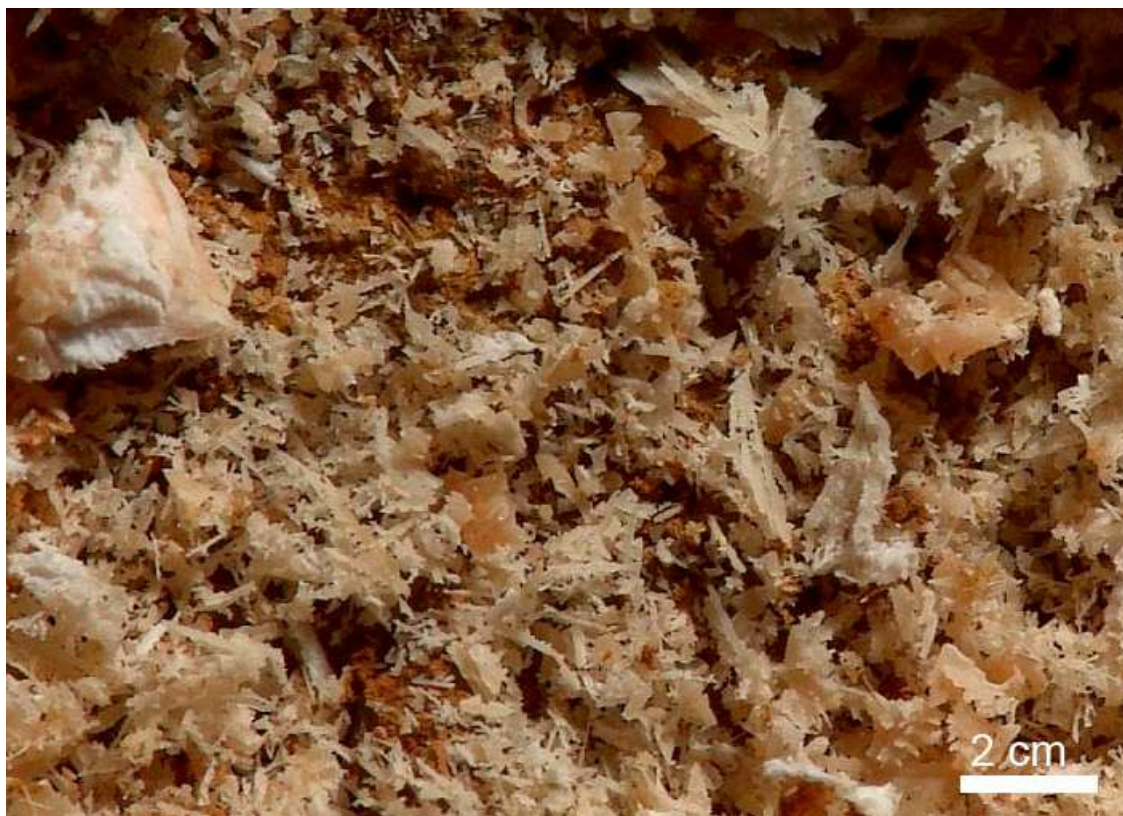

Fig. S6. Detailed view on the loose CCC covering the clay sediments on the cave bottom. Portálová Cave, Czech Republic. Photo by M. Majer

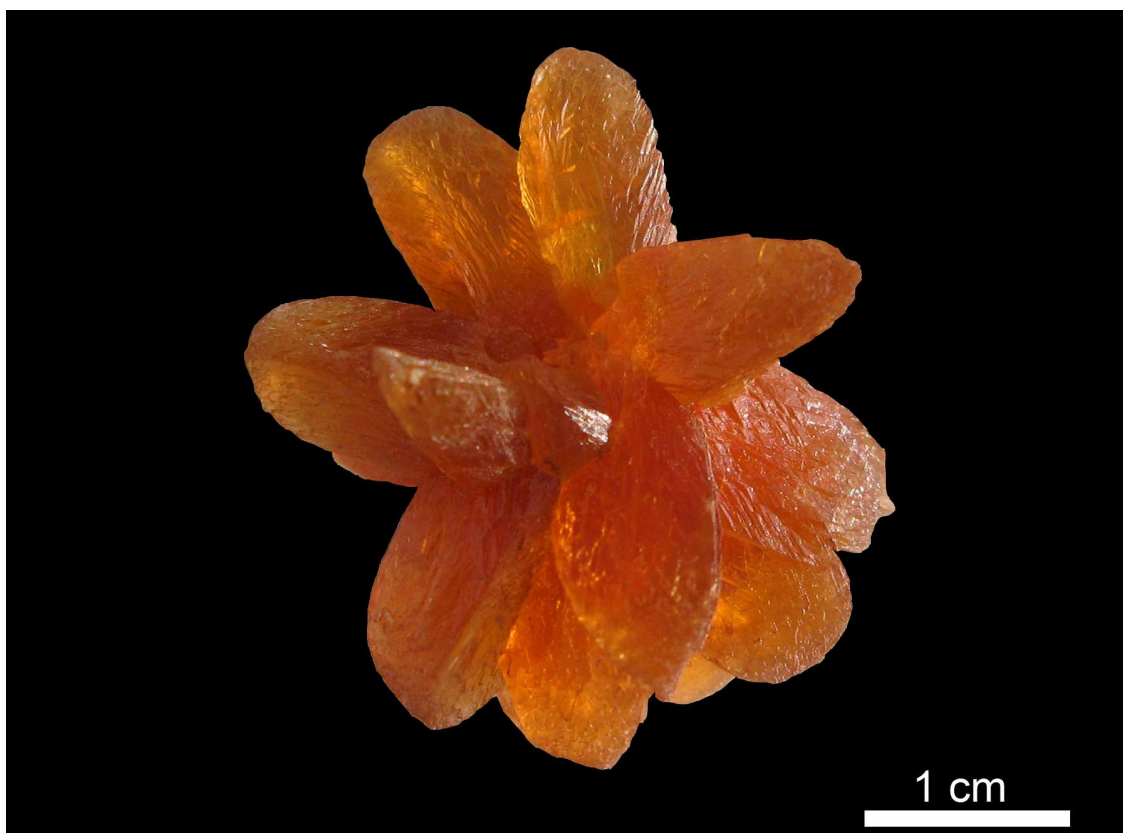

Fig. S7. A rosette aggregate of the CCC. Javoříčko Caves, Czech Republic. Photo by K. Žák.



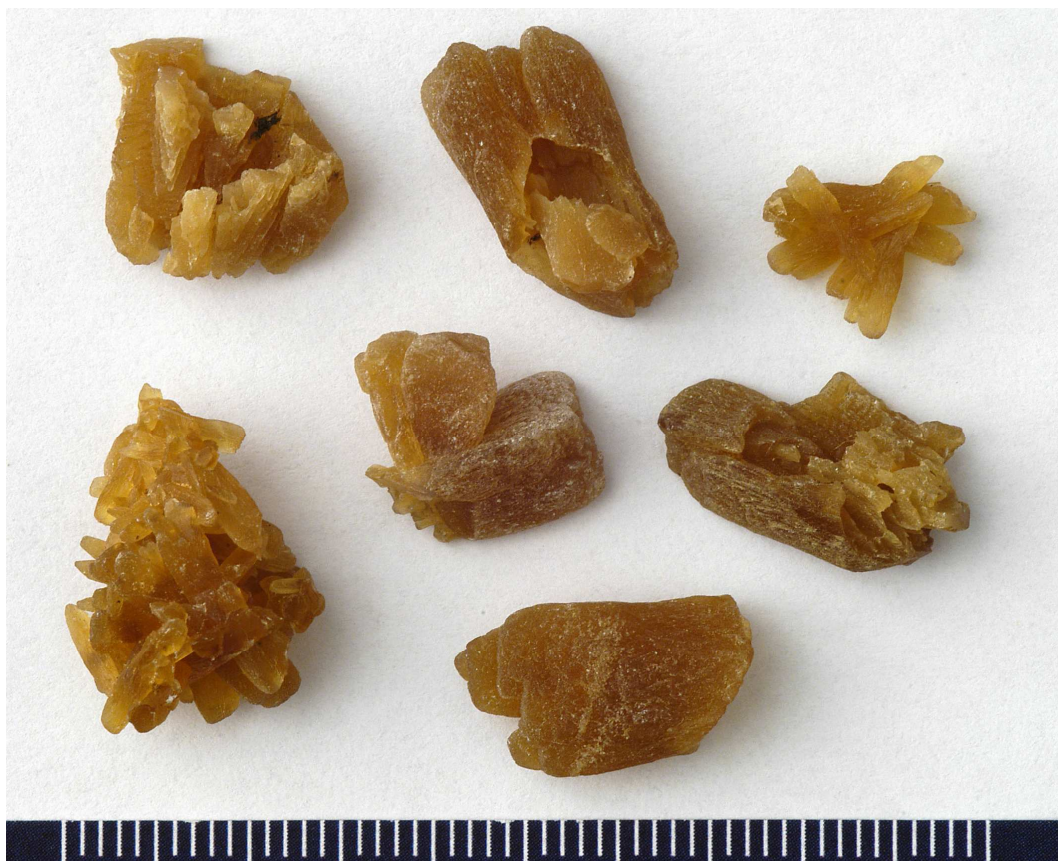

Fig. S8. Irregularly developed CCC crystals and their aggregates. Hačova Cave, Slovakia. Photo by J. Brožek.

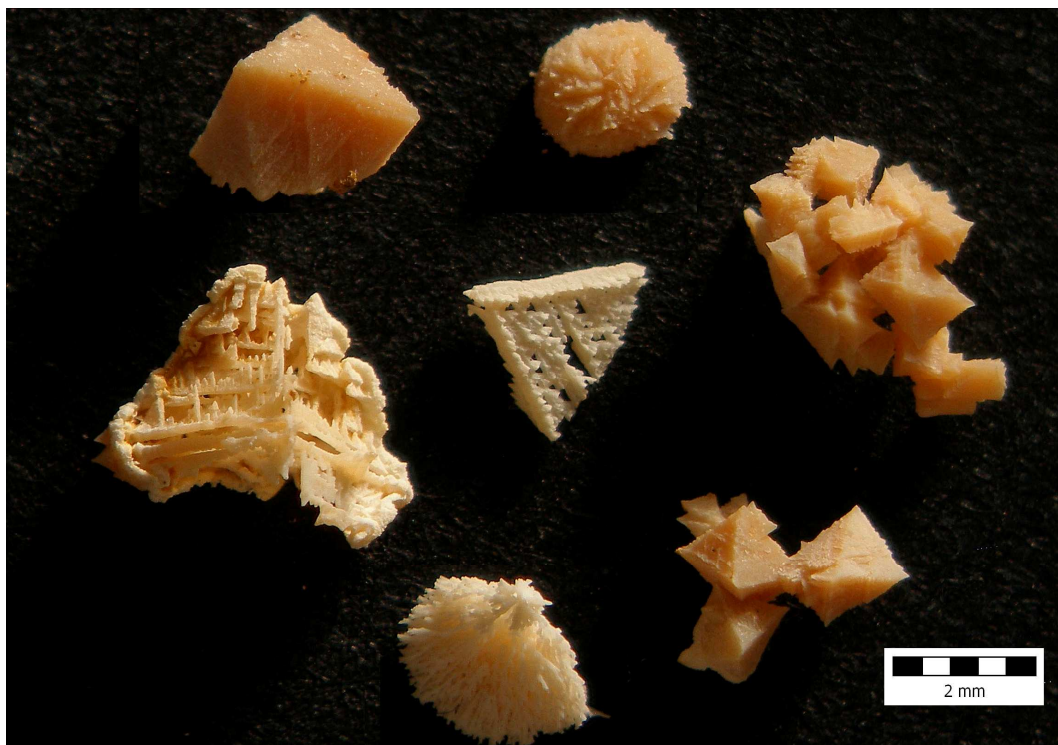

Fig. S9. Different CCC types (simple crystal, skeletal aggregates and globular form). Portálová Cave, Czech Republic. Photo by M. Filippi.



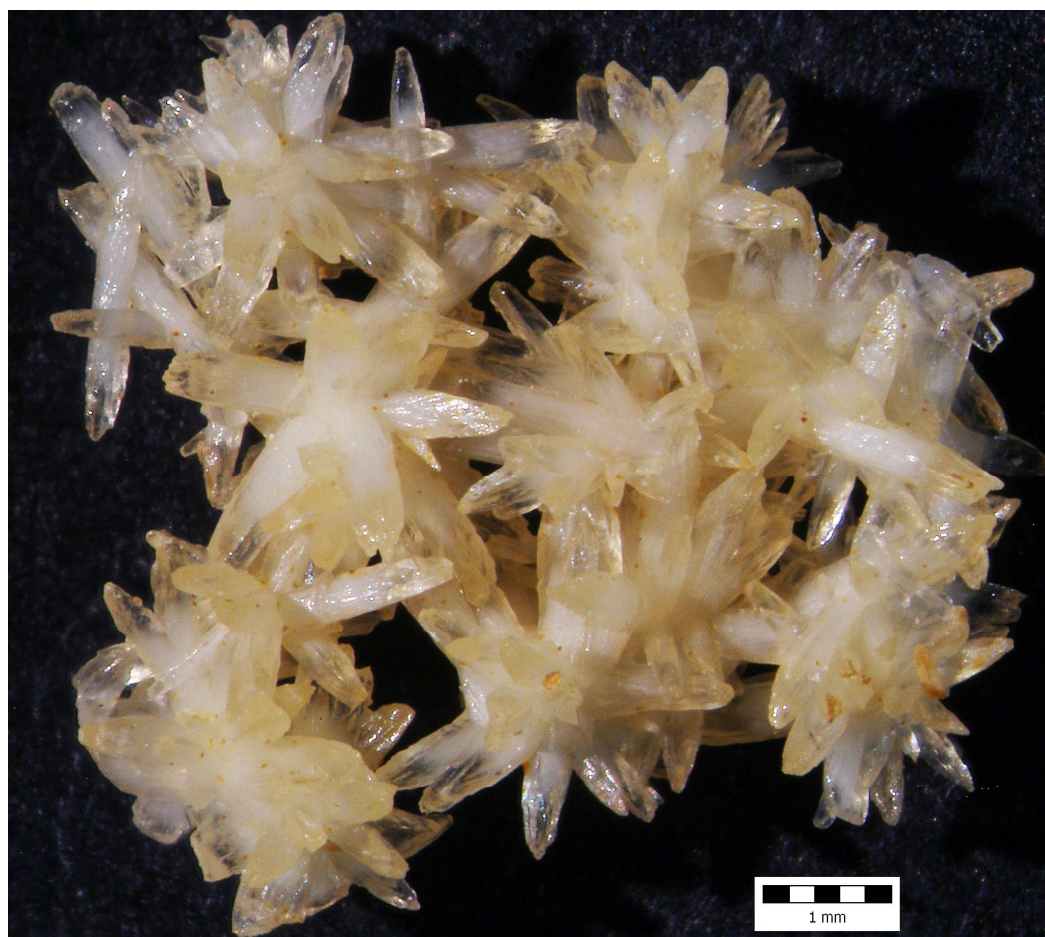

Fig. S10. “Raft-like” CCC aggregate. Javoříčko Caves, Czech Republic. Photo by M. Filippi.

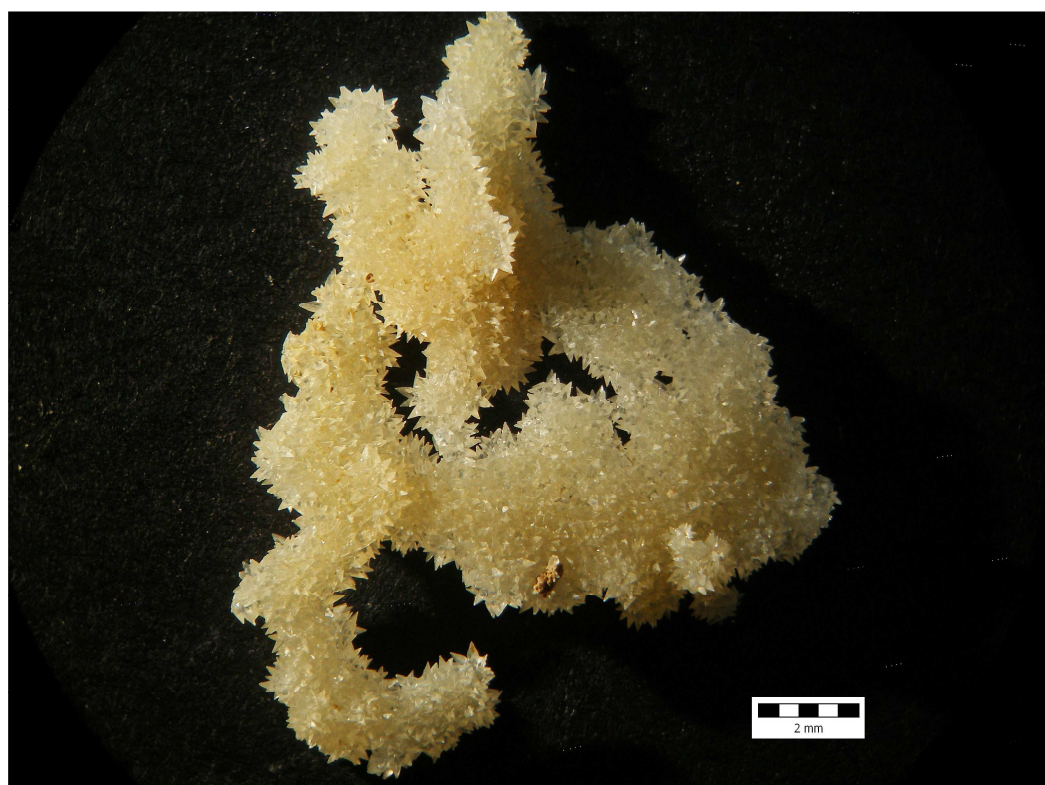

Fig. S11. “Raft-like” CCC aggregate. Na Javořce Cave, Czech Republic. Photo by M. Filippi.



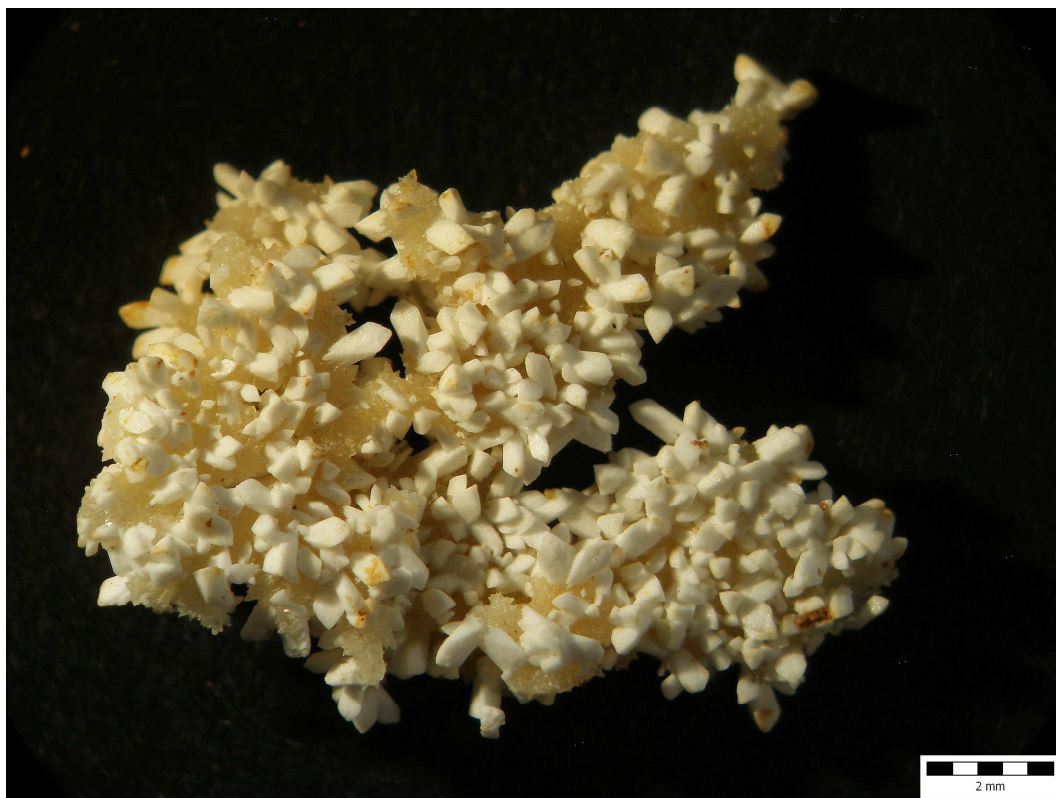

Fig. S12. Two-generation crystalline “raft-like” CCC aggregate. Na Javorce Cave, Czech Republic. Photo by M. Filippi.

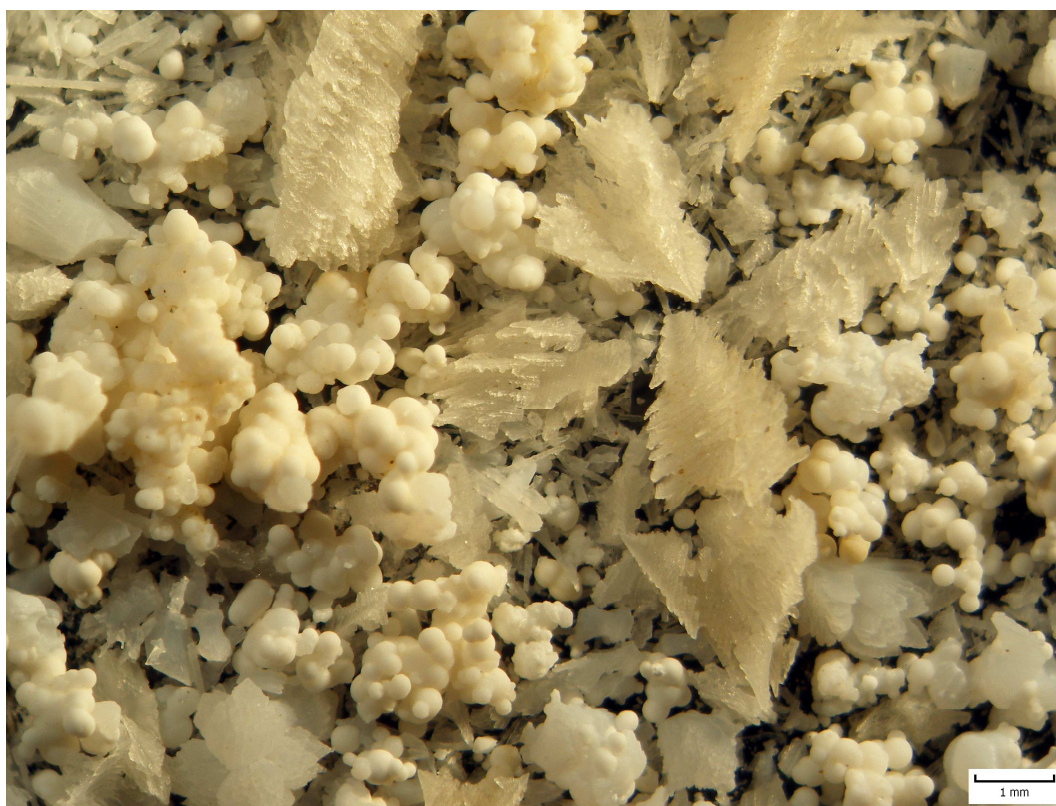

Fig. S13. Mixed skeletal and globular types of the CCC. Studeného Vetra Cave, Slovakia. Photo by M. Filippi.



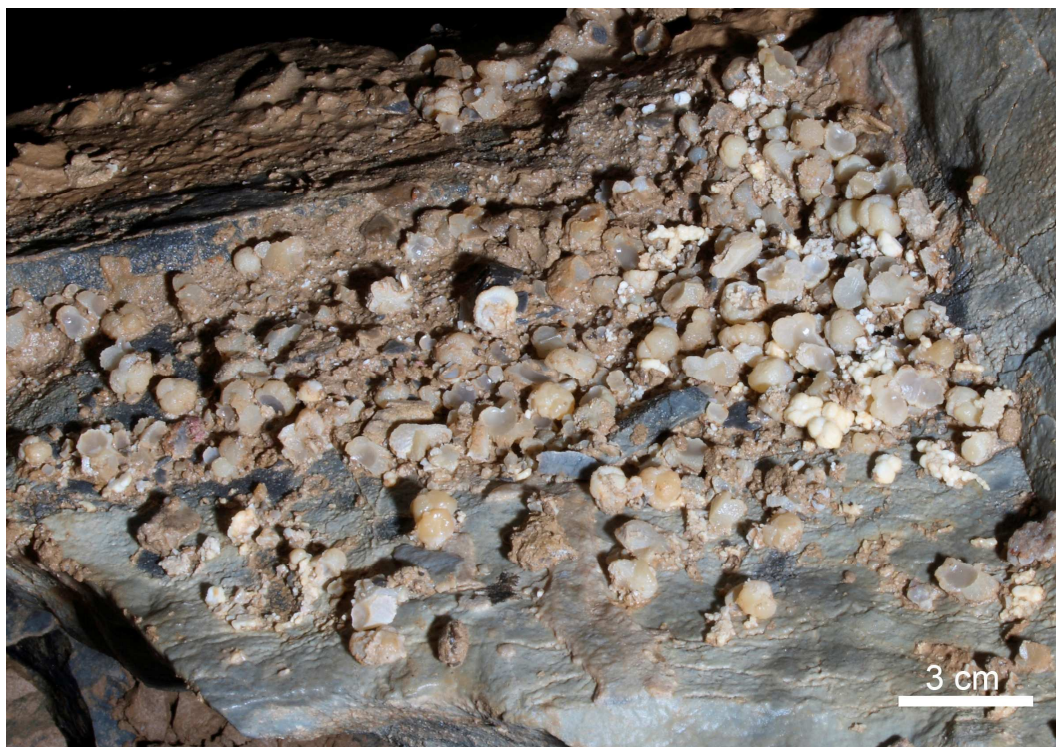

Fig. S14. Globular (hemispheric) CCC on the limestone block at the cave bottom. Malachitdom, Germany. Photo by M. Filippi.

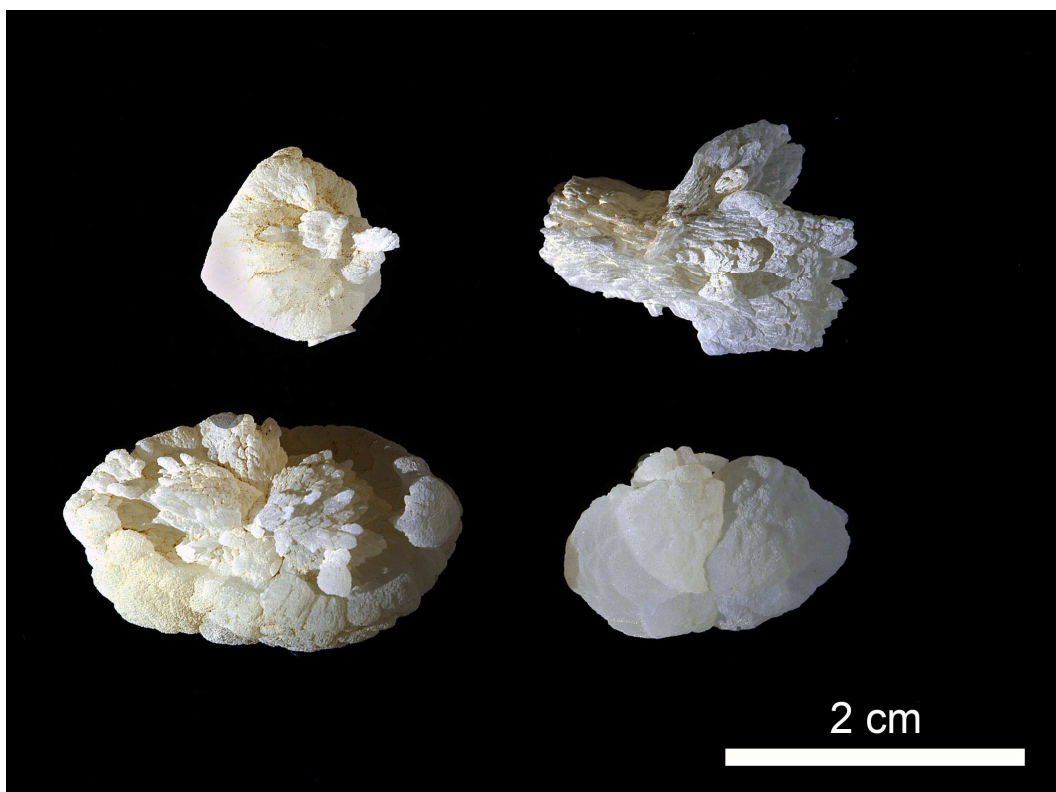

Fig. S15. Globular types of the CCC. Studeného Vetra Cave, Slovakia. Photo by J. Brožek.



Table S1. Characteristics of the studied caves. The U-series ages were obtained from three different laboratories: Heidelberg Academy of Sciences, Heidelberg (H), Institute of Geological Sciences of Polish Academy of Sciences, Warsaw (W), Max-Planck-Institute for Chemistry, Mainz (M). The MAAT temperatures of each area are derived from the closest meteorological stations, the cave air temperatures are based on one or several single measurements.

| Cave number<br><b>Cave name</b><br>Country            | Entrance<br>position<br>(deg. N, E)<br>elevation<br>(m a.s.l.) | Basic cave description<br>(cave ventilation).                                                                                                                                                     | Cave length (m)<br>Vertical extent (m)<br>MAAT surface (°C)<br>Cave air T (°C) | CCC<br>number of<br>sites, depth<br>below<br>surface                   | CCC age<br>(U-series,<br>ka BP)                                            | References,<br>dating<br>laboratories                                                                                                                |
|-------------------------------------------------------|----------------------------------------------------------------|---------------------------------------------------------------------------------------------------------------------------------------------------------------------------------------------------|--------------------------------------------------------------------------------|------------------------------------------------------------------------|----------------------------------------------------------------------------|------------------------------------------------------------------------------------------------------------------------------------------------------|
| 1<br><b>Apostelhöhle</b><br>Germany                   | 51°23' 41"<br>8°40'02"<br>501                                  | Complex maze of narrow, mostly vertical cavities in massive Devonian limestone, one narrow entrance (limited ventilation).                                                                        | ca. 1 000<br>106<br>9.0<br>8.0                                                 | two sites, 83 m and 93 m below entrance, ca. 50 - 60 m below the slope | 408+42-31<br>83.5±1.4<br>37.53±0.31<br>35.59±0.42                          | CCC description and dating: Richter et al. (2010b), dat. lab: H                                                                                      |
| 2<br><b>Dechenhöhle</b><br>Germany                    | 51°21' 57"<br>7°38'40"<br>175                                  | Mostly subhorizontal corridors in massive Devonian limestone, located at shallow depth, originally several entrances (moderate ventilation).                                                      | 870<br>ca. 10-11<br>10.0<br>10.0-11.0 (show cave)                              | one site<br>ca. 20 m                                                   | not dated<br>yet                                                           | CCC description: Richter and Niggemann (2005)                                                                                                        |
| 3<br><b>Glaseishöhle</b><br>Germany                   | 47°30' 44"<br>12°54' 42"<br>2 230                              | Alpine cave dominated by cavities extended in the vertical direction in Triassic limestone (strong ventilation).                                                                                  | 2 267<br>229<br>ca 0.0<br>1.0–2.0                                              | one site<br>229 m                                                      | not dated<br>yet                                                           | CCC description: Richter et al. (2009c)                                                                                                              |
| 4<br><b>Großen Sunderner Höhle</b><br>Germany         | 51°18' 45"<br>8°00' 48"<br>280                                 | Mostly water-level controlled cave with a large chamber at the crossing of fault-oriented corridors in Carboniferous limestone (moderate ventilation).                                            | 250<br>42<br>ca. 9.5<br>similar to MAAT                                        | one site<br>28 m                                                       | not dated<br>yet                                                           | CCC description: Richter et al. (2009a)                                                                                                              |
| 5<br><b>Heilenbecker Höhle</b><br>Germany             | 51°17' 35"<br>7°20' 34"<br>204                                 | Complex cave of multistage origin, mostly developed as epiphreatic maze in layered Devonian limestone, narrow entrance (limited ventilation).                                                     | 3 822<br>41<br>10.0<br>9.0                                                     | one site<br>about 25 m                                                 | 31.25±0.50                                                                 | CCC description: Richter et al. (2008); dating: Richter et al. (2009b); dat. lab: H                                                                  |
| 6<br><b>Herbst-labyrinth - Adventhöhle</b><br>Germany | 50°41' 17"<br>8°12' 23"<br>420                                 | Extensive cave system, mostly sub-horizontal, large, water-level controlled corridors in Devonian limestone (limited ventilation). CCC in Rätselhalle (Site 1) and Weihnachtsbaum-Halle (Site 2). | 5 800<br>80<br>9.3<br>9.3                                                      | two sites<br>both are 30 to 40 m below surface                         | Site 1:<br>29.17±0.48<br>28.70±1.50<br>Site 2:<br>23.96±0.18<br>23.59±0.30 | CCC description and dating: Rätselhalle - Kempe et al. (2006) and Richter et al. (2010a), Weihnachtsbaum-Halle: Richter et al. (2011); dat. lab: H   |
| 7<br><b>Malachitdom</b><br>Germany                    | 51°27' 56"<br>8°42' 02"<br>424                                 | Inclined cave in Devonian limestone with a large dome formed by corrosion, phreatic morphology, discovered by a quarry (limited ventilation).                                                     | 296<br>58<br>9.0<br>8.0                                                        | two sites<br>ca 45 and 50 m below original surface                     | 15.61±0.20<br>14.84±0.13<br>14.48±0.12                                     | CCC description: Erlenmeyer and Schudelski (1992), Schmidt (1992), Richter and Niggemann (2005), dating: Richter and Riechelmann (2008); dat. lab: H |



|    |                                   |                                                                                                                                                                                   |                                                              |                                                             |                                                                                        |                                                                                        |
|----|-----------------------------------|-----------------------------------------------------------------------------------------------------------------------------------------------------------------------------------|--------------------------------------------------------------|-------------------------------------------------------------|----------------------------------------------------------------------------------------|----------------------------------------------------------------------------------------|
| 8  | 51°21' 00"<br>8°24' 00"<br>448    | Cave system in Devonian limestone with three epiphreatic subhorizontal levels (CCC occurs in a main corridor of the middle level, limited ventilation).                           | 622<br>18<br>ca. 9.5<br>9.5                                  | one site<br>10 m below<br>the surface                       | not dated<br>yet                                                                       | CCC description:<br>Richter and Niggemann (2005)                                       |
| 9  | 52°12' 16"<br>9°17' 16"<br>276    | Epiphreatic cave system in Jurassic limestone with long subhorizontal water-level controlled corridors (limited ventilation).                                                     | 1 127<br>20<br>9.0<br>9.0                                    | two sites<br>30 to 40 m<br>below the<br>surface             | 66.4±0.5<br>62.0±0.4<br>61.6±0.4<br>53.7±0.3<br>12.0±0.1<br>11.9±0.1                   | CCC description and dating: this work and Richter et al. (under review), dating lab: M |
| 10 | 49°56' 37"<br>14°07' 42"<br>246   | Cave with phreatic morphology developed in layered Devonian limestone with a large dome accessible only via long and narrow corridors (limited ventilation).                      | 274<br>31<br>ca. 8.5<br>similar to MAAT (no precise data)    | one site<br>45 m                                            | 33.77±1.77<br>25.95±1.53                                                               | CCC description and dating: Žák et al. (2004); dating lab: W                           |
| 11 | 49°40' 13"<br>16°54' 49"<br>445   | Extensive cave system in Devonian limestone, developed at several levels (limited ventilation).                                                                                   | ca. 4 000<br>108<br>ca. 8<br>similar to MAAT                 | two sites<br>approx.<br>30 m                                | 38.09±0.60<br>37.84±0.73<br>34.60±0.41                                                 | CCC description: Žák et al. (2011), dating: this work; dating lab: H                   |
| 12 | 49°56' 17"<br>14°10' 59"<br>330   | Complicated extensive system of narrow shafts and corridors formed in layered Devonian limestone (limited ventilation).                                                           | 1 634<br>129<br>ca. 8<br>similar to MAAT (no precise data)   | three sites<br>site 1: 45 m<br>site 2: 60 m<br>site 3: 65 m | Site 1:<br>50.04±0.59<br>28.56±0.17<br>Site 2:<br>14.98±0.17<br>Site 3:<br>9.191±0.072 | CCC description: Žák et al. (2011), dating: this work; dating lab: H                   |
| 13 | 49°54' 56"<br>14°03' 48"<br>402   | Cave system in massive Devonian limestone developed by corrosion along faults, communication with surface only via narrow chimneys, discovered by a quarry (limited ventilation). | ca. 200<br>32<br>ca. 8<br>similar to MAAT (no precise data)  | one site<br>60 m                                            | 34.26±0.72                                                                             | CCC description: Žák et al. (2011), dating: this work; dating lab: H                   |
| 14 | 49°56' 58"<br>14°07' 15"<br>242   | Smaller cave system in layered Devonian limestone, almost completely sediment-filled, the CCC site was discovered by excavation of corridors (limited ventilation).               | ca. 180<br>17<br>ca 8.5<br>similar to MAAT (no precise data) | one site<br>28 m                                            | 34.45±0.34<br>34.01±0.38                                                               | CCC description: Žák et al. (2011), dating: this work; dating lab: H                   |
| 15 | 48°31' 04"<br>17°23' 33"<br>690   | Morphologically complex cave developed in Triassic limestone, located in a hilly range (moderate ventilation).                                                                    | 660<br>73<br>7.7<br>average 6.8, locally down to 5.8         | one site<br>45 m                                            | 47.58±0.55                                                                             | CCC description: Šmída (2010), Žák et al. (2011), dating: this work; dating lab: H     |
| 16 | 49°13' 00"<br>20°07' 20"<br>1 767 | Large mountain cave system with only one CCC site. The deepest CCC site known so far (moderate ventilation).                                                                      | ca. 26 000<br>451<br>1.0<br>1.0-3.5                          | one site<br>285 m below<br>the closest<br>surface           | 17.13±0.12                                                                             | CCC description: Žák et al. (2011), dating: this work, dating lab: H                   |



|                     |            |                         |                   |              |            |                     |
|---------------------|------------|-------------------------|-------------------|--------------|------------|---------------------|
| 17                  | 48°51' 45" | Extensive complex,      | 22 027            | two sites    | 23.43±1.05 | CCC description:    |
| <b>Stratenská</b>   | 20°18' 50" | multi-level cave        | 194               | both at ca.  | 22.61±1.44 | Tulis and Novotný   |
| <b>Cave</b>         | 995        | system developed in     | 4.7               | 120 m        | 21.16±2.66 | (1989), Hill and    |
| Slovakia            |            | Triassic limestone,     | 4.9               |              |            | Forti (1997),       |
|                     |            | with large galleries    |                   |              |            | description and     |
|                     |            | and chambers,           |                   |              |            | dating: Žák et al.  |
|                     |            | formed by               |                   |              |            | (2004); dating lab: |
|                     |            | allochthonous water     |                   |              |            | W                   |
|                     |            | streams (could have     |                   |              |            |                     |
|                     |            | strong ventilation in   |                   |              |            |                     |
|                     |            | the past).              |                   |              |            |                     |
| 18                  | 48°55' 35" | Pre-Quaternary cave     | 1 518             | two sites    | 180.0±6.3  | CCC description     |
| <b>Studeného</b>    | 19°39' 19" | system located in       | 107               | both at ca.  | 104.0±2.9  | and dating: Žák et  |
| <b>vetra (Cold</b>  | 1 678      | Triassic limestone      | 0.8               | 50-60 m      | 79.7±2.3   | al. (2009a); dating |
| <b>Wind) Cave</b>   |            | with large domes,       | ca. 2.5           |              |            | lab: W              |
| Slovakia            |            | fossilized in the       |                   |              |            |                     |
|                     |            | mountain range          |                   |              |            |                     |
|                     |            | (limited ventilation).  |                   |              |            |                     |
| 19                  | 49°13' 33" | An extensive cave       | 870               | one site     | 15.74±0.47 | CCC description:    |
| <b>Verných</b>      | 20°10' 16" | system in Triassic      | 50                | ca. 50 m     |            | Orvošová and        |
| <b>(Faithfull</b>   | 1 522      | limestone with          | 1.9               |              |            | VIček (2012);       |
| <b>People) Cave</b> |            | relatively large        | 2.8-3.0           |              |            | dating this work;   |
| Slovakia            |            | corridors (moderate     |                   |              |            | dating lab: H       |
|                     |            | ventilation).           |                   |              |            |                     |
| 20                  | 50°51' 33" | Extensive cave          | 3 670             | ca. 12 sites | 61.0±1.8   | CCC description:    |
| <b>Cave System</b>  | 20°29' 56" | system, mostly          | 59                | 33-43 m      | 53.0±1.5   | Durakiewicz et al.  |
| <b>Jama</b>         | 257        | phreatic, developed in  | ca. 6.0-7.0       |              | 40.0±1.3   | (1995),             |
| <b>Chelosiowa-</b>  |            | Devonian limestones     | similar to MAAT   |              | 38.8±1.4   | description and     |
| <b>Jaskinia</b>     |            | under a small hill in a | (no precise data) |              | 36.0±1.2   | dating: Žák et al.  |
| <b>Jaworznicka</b>  |            | relatively flat country |                   |              |            | (2004), dating lab: |
| Poland              |            | (limited ventilation).  |                   |              |            | W                   |



Table S2. New U-series data on coarsely crystalline CCC obtained in Heidelberg. All ages are reported in years BP (Before Present, relative to 1950). The errors are  $2\sigma$ .

| Lab. No. | Field No. | Sample location and description                                                                                  | $\delta^{234}\text{U}$<br>(initial)<br>(‰) | $^{238}\text{U}$<br>( $\mu\text{g/g}$ ) | $^{232}\text{Th}$<br>( $\text{ng/g}$ ) | $^{230}\text{Th}$<br>( $\text{pg/g}$ ) | Age uncorr.<br>(ka) | Age corrected<br>(ka)              |
|----------|-----------|------------------------------------------------------------------------------------------------------------------|--------------------------------------------|-----------------------------------------|----------------------------------------|----------------------------------------|---------------------|------------------------------------|
| 5217     | PORT1     | Portálová Cave, Czech Republic, crystals and crystal aggregates                                                  | 898.2<br>$\pm 6.5$                         | 8.6785<br>$\pm 0.0087$                  | 4.226<br>$\pm 0.022$                   | 74.59<br>$\pm 0.57$                    | 34.46               | <b>34.45<math>\pm 0.34</math></b>  |
| 5281     | PORT2     | Portálová Cave, Czech Republic, the same site, hemispheres                                                       | 887.3<br>$\pm 5.3$                         | 6.5312<br>$\pm 0.0065$                  | 4.152<br>$\pm 0.032$                   | 55.19<br>$\pm 0.52$                    | 34.02               | <b>34.01<math>\pm 0.38</math></b>  |
| 5218     | CJVK1     | Na Javorce Cave, Czech Republic, Karakorum Section, flat rafts formed by clear yellowish crystals                | 1297.7<br>$\pm 4.0$                        | 5.2694<br>$\pm 0.0053$                  | 80.97<br>$\pm 0.31$                    | 46.79<br>$\pm 0.23$                    | 28.75               | <b>28.56<math>\pm 0.17</math></b>  |
| 5282     | CJVK2     | Na Javorce Cave, Czech Republic, the same site as CJVK1, flat rafts formed by white porous crystals              | 1364.7<br>$\pm 9.2$                        | 2.1741<br>$\pm 0.0054$                  | 28.89<br>$\pm 0.18$                    | 32.16<br>$\pm 0.27$                    | 50.18               | <b>50.04<math>\pm 0.59</math></b>  |
| 5256     | CJVK3     | Na Javorce Cave, Czech Republic, Půda Section (the deeper one), cave rafts, white                                | 2304.6<br>$\pm 5.7$                        | 2.4009<br>$\pm 0.0024$                  | 30.60<br>$\pm 0.21$                    | 16.97<br>$\pm 0.19$                    | 15.09               | <b>14.98<math>\pm 0.17</math></b>  |
| 5257     | MJAV1     | Javoříčko Caves, Czech Republic, Olomouc Chamber, rafts formed by yellowish crystals                             | 1144.7<br>$\pm 10.4$                       | 0.32932<br>$\pm 0.00066$                | 8.627<br>$\pm 0.055$                   | 3.493<br>$\pm 0.056$                   | 38.17               | <b>37.84<math>\pm 0.73</math></b>  |
| 5283     | MJAV2     | Javoříčko Caves, Czech Republic, Olomouc Chamber, rafts, another site                                            | 1179.3<br>$\pm 7.7$                        | 0.5128<br>$\pm 0.0010$                  | 26.81<br>$\pm 0.14$                    | 5.578<br>$\pm 0.073$                   | 38.75               | <b>38.09<math>\pm 0.60</math></b>  |
| 5219     | SHAC1     | Hačova Cave, Slovakia, brownish crystals, partly skeletal aggregates                                             | 466.4<br>$\pm 5.2$                         | 0.9385<br>$\pm 0.0019$                  | 0.9655<br>$\pm 0.0039$                 | 8.122<br>$\pm 0.070$                   | 47.60               | <b>47.58<math>\pm 0.55</math></b>  |
| 5224     | MEST1     | Mesačný Tieň Cave, Slovakia, white crystal aggregates                                                            | 183.9<br>$\pm 1.7$                         | 14.250<br>$\pm 0.014$                   | 41.27<br>$\pm 0.14$                    | 40.38<br>$\pm 0.25$                    | 17.20               | <b>17.13<math>\pm 0.12</math></b>  |
| 5515     | NOVO1     | Novoroční Cave, Czech Republic, one large white crystal aggregate                                                | 1451.8<br>$\pm 9.5$                        | 0.96340<br>$\pm 0.00190$                | 1.946<br>$\pm 0.018$                   | 10.700<br>$\pm 0.190$                  | 34.28               | <b>34.26<math>\pm 0.72</math></b>  |
| 5516     | VERJ1     | Verných Cave, Slovakia, crystal aggregates, partly also cave rafts                                               | 1240.4<br>$\pm 9.6$                        | 1.1873<br>$\pm 0.0012$                  | 34.230<br>$\pm 0.340$                  | 6.020<br>$\pm 0.160$                   | 16.10               | <b>15.74<math>\pm 0.47</math></b>  |
| 5522     | CJVK18    | Na Javorce Cave, Czech Republic, cavity below the Půda Section (the deepest one), small white crystal aggregates | 6955.9<br>$\pm 11.3$                       | 1.7141<br>$\pm 0.0017$                  | 21.65<br>$\pm 0.10$                    | 18.25<br>$\pm 0.14$                    | 9.236               | <b>9.191<math>\pm 0.072</math></b> |
| 5523     | MJAV3     | Javoříčko Cave, Czech Republic, Ivošovy Caves section, large, brown-colored aggregates                           | 1558.7<br>$\pm 14.8$                       | 1.6121<br>$\pm 0.0016$                  | 15.758<br>$\pm 0.085$                  | 18.88<br>$\pm 0.16$                    | 34.70               | <b>34.60<math>\pm 0.41</math></b>  |



Table S3. New U-series data on coarsely crystalline CCC for the Riesenberghöhle, Germany, obtained in Mainz. All ages are reported in years BP (Before Present, relative to 1950). The errors are  $2\sigma$ .

| Sample<br>(Riesenberghöhle)    | $^{238}\text{U}$<br>( $\mu\text{g/g}$ ) | $^{232}\text{Th}$<br>( $\text{ng/g}$ ) | ( $^{234}\text{U}/^{238}\text{U}$ ) | ( $^{230}\text{Th}/^{238}\text{U}$ ) | Age<br>uncorrected<br>(ka) | Age<br>corrected<br>(ka)       |
|--------------------------------|-----------------------------------------|----------------------------------------|-------------------------------------|--------------------------------------|----------------------------|--------------------------------|
| "Zopfsinter" RieSe             | 2.75<br>$\pm 0.02$                      | 1.55<br>$\pm 0.02$                     | 1.7873<br>$\pm 0.0029$              | 0.7163<br>$\pm 0.0028$               | 53.7 $\pm$ 0.3             | <b>53.7<math>\pm</math>0.3</b> |
| "Zopfsinter-1", white          | 0.564<br>$\pm 0.005$                    | 2.20<br>$\pm 0.03$                     | 1.6201<br>$\pm 0.0029$              | 0.7634<br>$\pm 0.0039$               | 66.5 $\pm$ 0.5             | <b>66.4<math>\pm</math>0.5</b> |
| "Zopfsinter-1", brown          | 1.67<br>$\pm 0.01$                      | 2.69<br>$\pm 0.03$                     | 1.5620<br>$\pm 0.0029$              | 0.1625<br>$\pm 0.0011$               | 11.9 $\pm$ 0.1             | <b>11.9<math>\pm</math>0.1</b> |
| "Zopfsinter-2", white          | 1.41<br>$\pm 0.01$                      | 0.80<br>$\pm 0.01$                     | 1.5294<br>$\pm 0.0023$              | 0.6784<br>$\pm 0.0030$               | 61.6 $\pm$ 0.4             | <b>61.6<math>\pm</math>0.4</b> |
| Rhombohedral "Sinter-1", white | 1.35<br>$\pm 0.01$                      | 2.89<br>$\pm 0.03$                     | 1.5254<br>$\pm 0.0025$              | 0.6800<br>$\pm 0.0031$               | 62.0 $\pm$ 0.4             | <b>62.0<math>\pm</math>0.4</b> |
| Rhombohedral "Sinter-1", brown | 1.65<br>$\pm 0.01$                      | 7.23<br>$\pm 0.08$                     | 1.5626<br>$\pm 0.0026$              | 0.1630<br>$\pm 0.0010$               | 12.0 $\pm$ 0.1             | <b>12.0<math>\pm</math>0.1</b> |
